# Supplementary material for: Fusobacterium nucleatum confers chemoresistance by modulating autophagy in oesophageal squamous cell carcinoma
Source: PubMed Central journal article supplement (PMC7921654; doi:10.1038/s41416-020-01198-5), 2020-12-10
Supplement: 41416_2020_1198_MOESM1_ESM.pdf [file 41416_2020_1198_MOESM1_ESM.pdf]

**Supplementary Table 1.**

Clinicopathological features in 95 patients with PET data

|          | <i>F. nucleatum</i> expression |             | <i>p</i> -value |
|----------|--------------------------------|-------------|-----------------|
|          | Low (n=68)                     | High (n=27) |                 |
| Mean age | 67                             | 64          | 0.08            |
| Sex      |                                |             | 0.69            |
| Male     | 60                             | 26          |                 |
| Female   | 8                              | 1           |                 |
| Location |                                |             | 0.54            |
| Upper    | 22                             | 7           |                 |
| Lower    | 46                             | 20          |                 |
| T stage  |                                |             | 0.12            |
| T1       | 9                              | 3           |                 |
| T2       | 12                             | 1           |                 |
| T3-      | 47                             | 23          |                 |
| N stage  |                                |             | 0.82            |
| N0       | 6                              | 2           |                 |
| N1-3     | 62                             | 25          |                 |

**Supplementary Table 2.**

Clinicopathological features of Cohort B

| <i>Total N=30</i> |    |
|-------------------|----|
| Mean age          | 69 |
| Sex               |    |
| Male              | 27 |
| Female            | 3  |
| Location          |    |
| Upper             | 11 |
| Lower             | 19 |
| Stage             |    |
| II                | 7  |
| III               | 10 |
| IV                | 13 |

**Supplementary Table 3:** cohort C

|                      | ATG-7 expression |             | <i>p</i> -value |
|----------------------|------------------|-------------|-----------------|
|                      | Low (n=225)      | High (n=59) |                 |
| Mean age ± SD        | 66 (41-89)       | 66 (48-80)  | 0.72            |
| Sex                  |                  |             | 0.17            |
| Male                 | 202              | 49          |                 |
| Female               | 23               | 10          |                 |
| Performance status   |                  |             | 0.88            |
| 0                    | 173              | 47          |                 |
| 1                    | 42               | 10          |                 |
| 2                    | 10               | 2           |                 |
| Tobacco use          |                  |             | 0.18            |
| yes                  | 194              | 55          |                 |
| no                   | 31               | 4           |                 |
| Alcohol use          |                  |             | 1.0             |
| yes                  | 214              | 57          |                 |
| no                   | 11               | 2           |                 |
| Stage                |                  |             | 0.02            |
| 0                    | 16               | 0           |                 |
| I                    | 65               | 10          |                 |
| II                   | 59               | 21          |                 |
| III                  | 58               | 20          |                 |
| IV                   | 26               | 8           |                 |
| Preoperative therapy |                  |             | 0.54            |
| present              | 87               | 20          |                 |
| Absent               | 138              | 39          |                 |

# Supplementary Figures

**A**

## T3 patients only

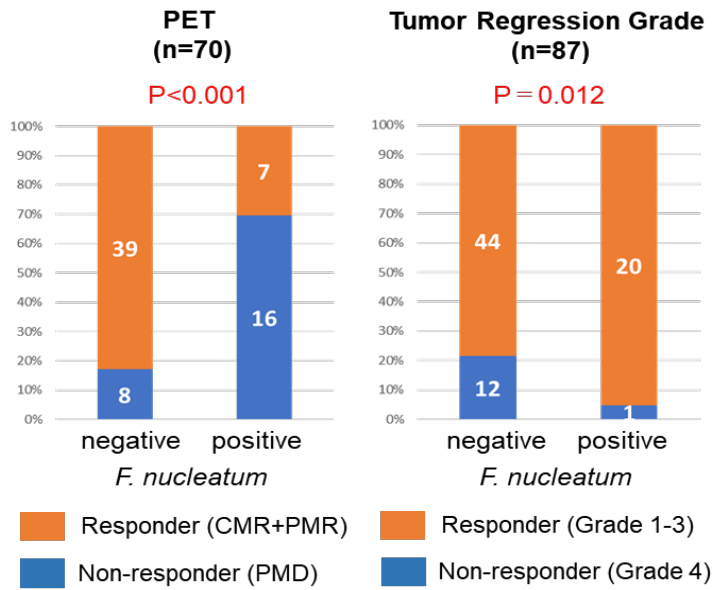

**B**

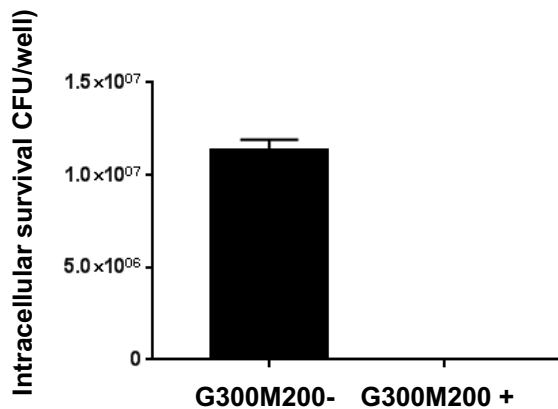

**C**

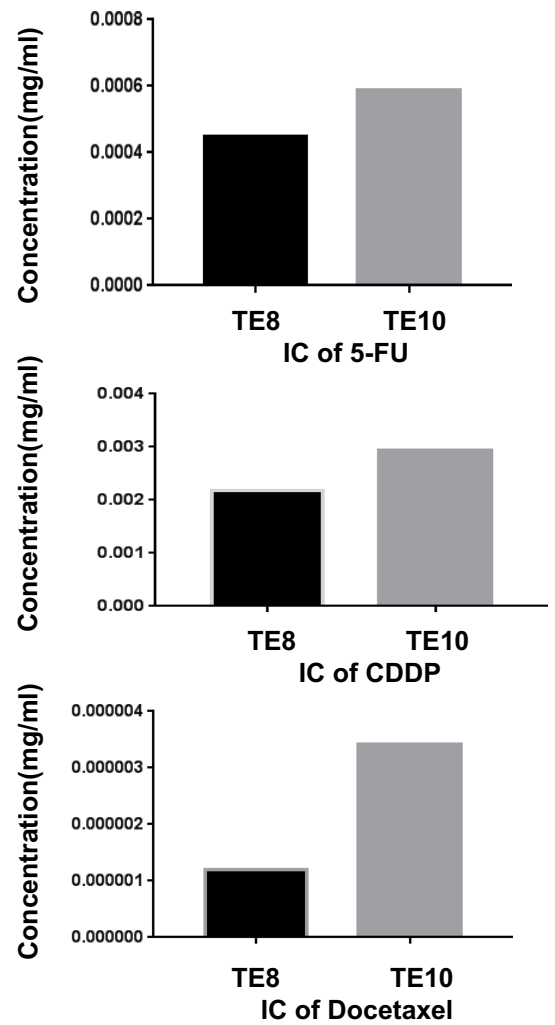

**D**

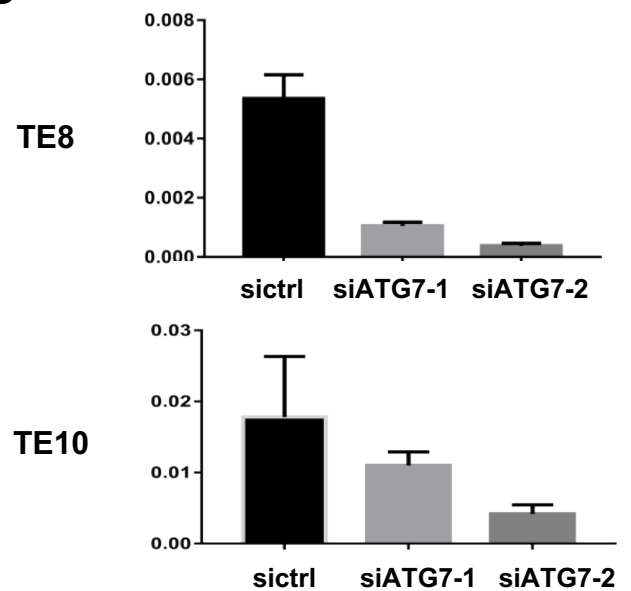

**A.** The responses of SUVmax and Tumor Regression Grade according to *F. nucleatum* status among T3 patients only in Cohort A.

**B.** Determination of minimum inhibitory concentration (MIC) to demonstrate that metronidazole (200µg/ml) and gentamicin (300µg/ml) kill 5X10<sup>7</sup>/ml *F. nucleatum* in 1 h completely.

**C.** Half-maximal inhibitory concentration (IC<sub>50</sub>) of 5-FU, CDDP, and Docetaxel in TE8 and TE10 cells calculated according to growth assay.

**D.** qPCR analysis to check the mRNA levels of ATG7 upon knockdown using siATG7-1 and siATG7-2 in 72 hours.

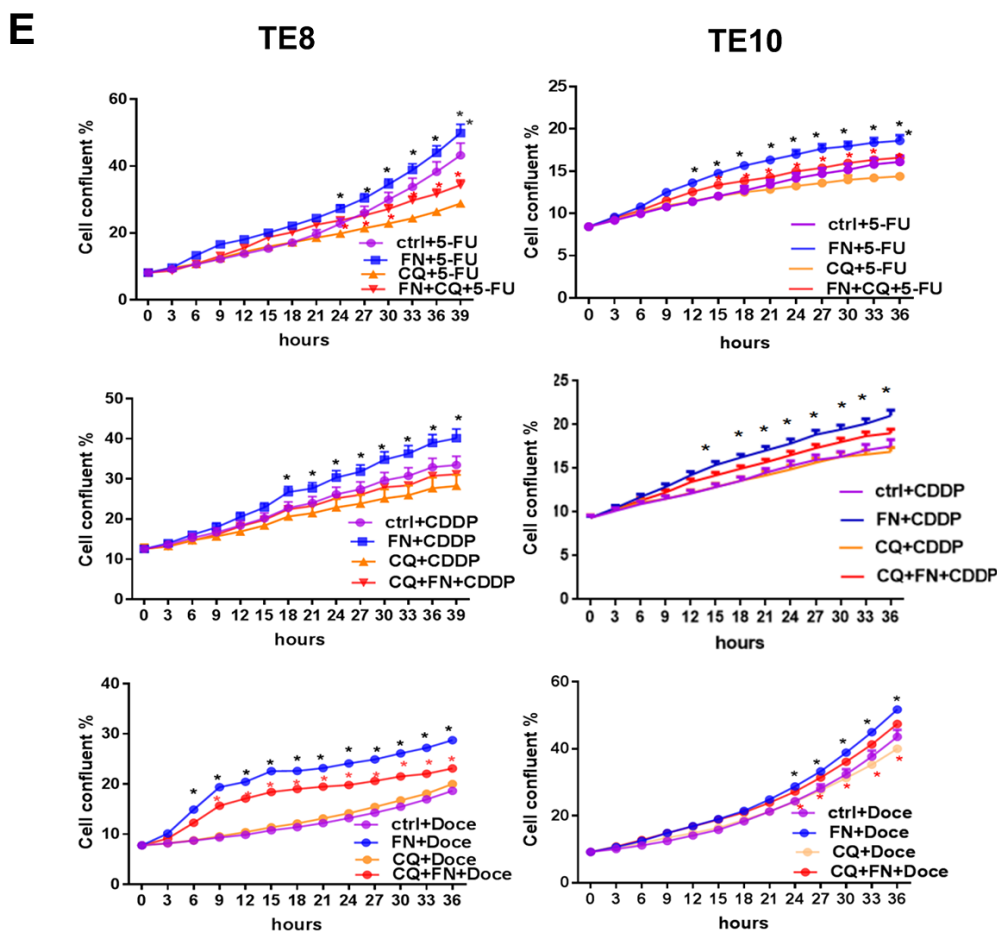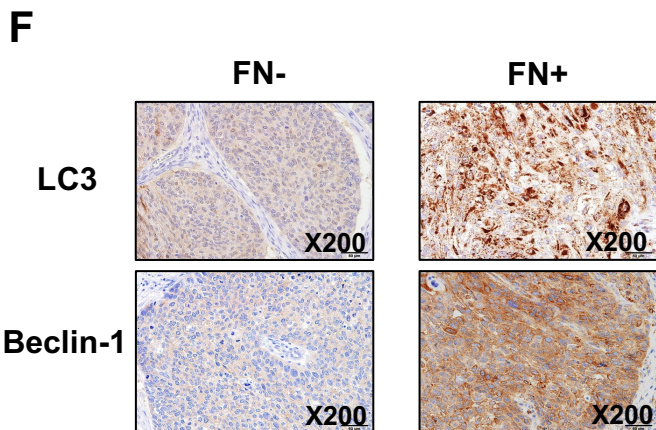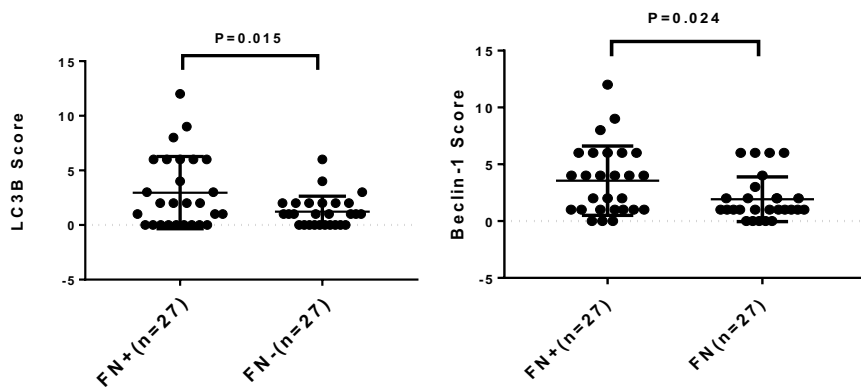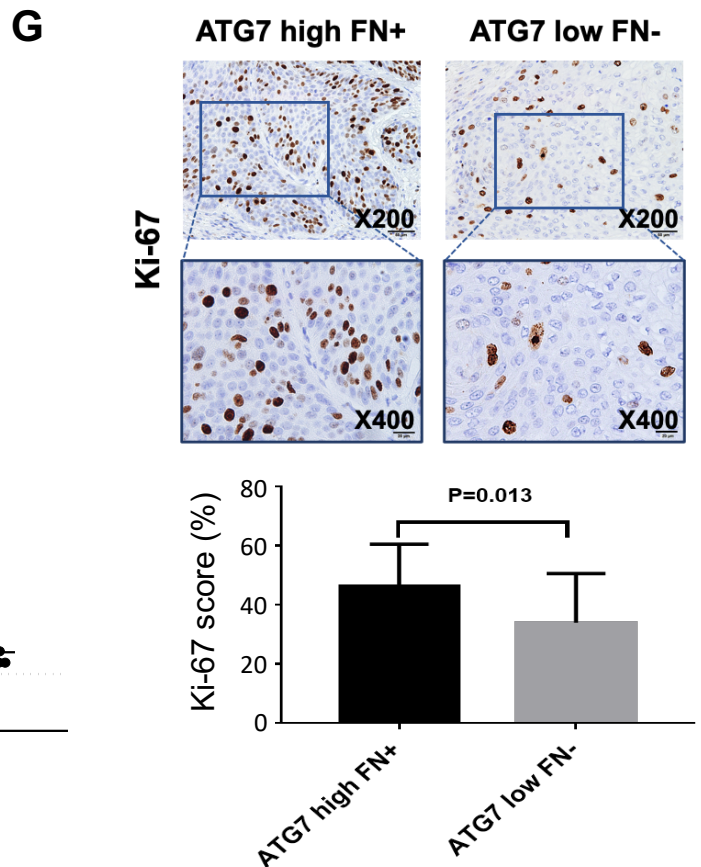

**E.** Cell proliferation assay in IncuCyte showing that CQ could decrease the growth of TE8 and TE10 in *F. nucleatum* group compared with that in only *F. nucleatum* group. \*  $P < 0.05$  (red and black) indicate significant difference between ctrl and *F. nucleatum* groups and CQ and CQ+ *F. nucleatum* groups.

**F.** Immunohistochemical analysis of LC3 and Beclin-1 protein expression tumor lesions from ESCC patients. Higher LC3 and Beclin-1 score were observed in the *F. nucleatum* (+) group compared to the *F. nucleatum* (-) group ( $P=0.015$  and  $P=0.024$ , respectively)

**G.** Immunohistochemical analysis of Ki-67 expression from ESCC patients' sample. Higher Ki-67 were observed in the ATG7 high *F. nucleatum* (+) group compared to the ATG7 low *F. nucleatum* (-) group ( $P=0.013$ ).

**H**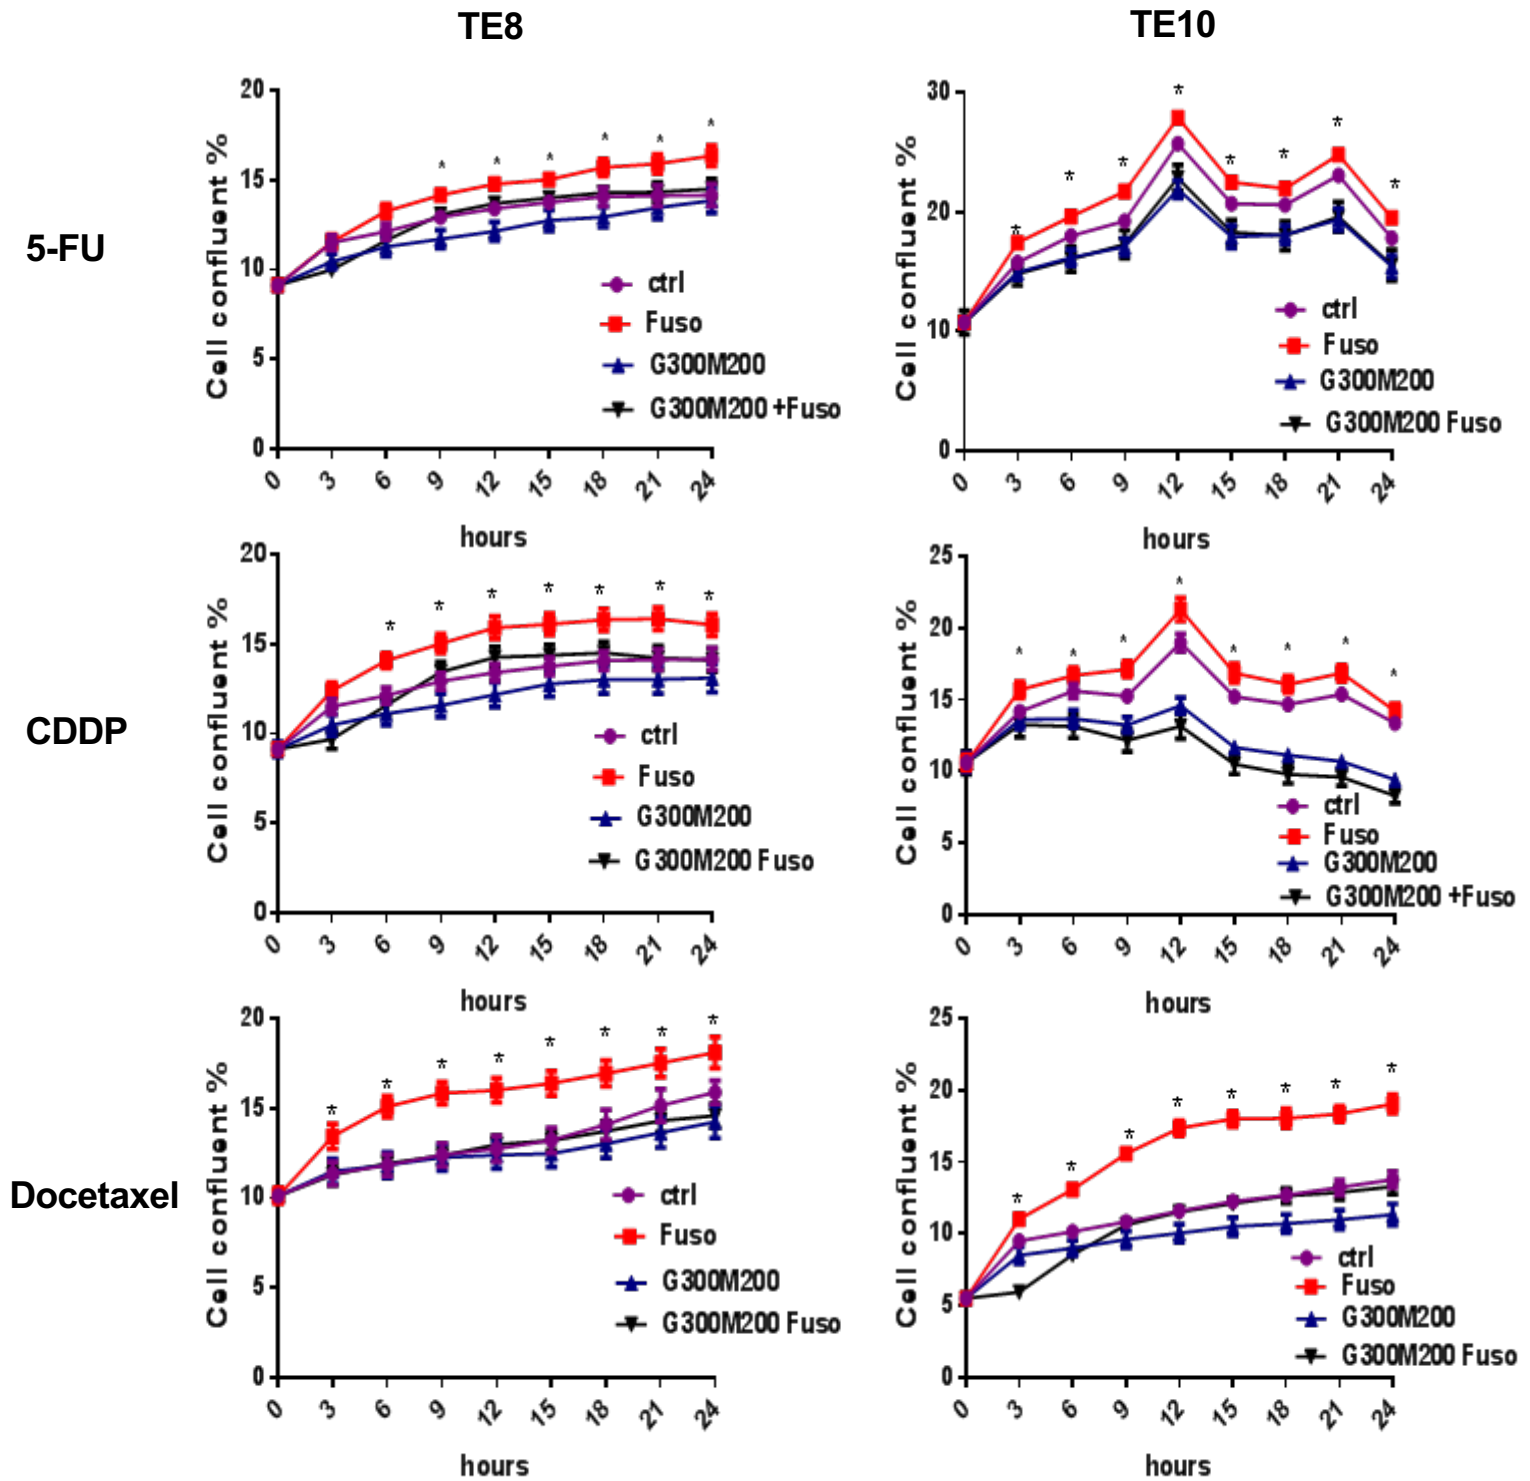

H. Cell proliferation assay in IncuCyte showing that gentamicin (300 µg/ml) and metronidazole (200 µg/ml) could decrease the growth of TE8 and TE10 in *F. nucleatum* group treated with 5-FU, CDDP, and Docetaxel. \* P<0.05 indicate significant difference between *F. nucleatum* group and *F. nucleatum* treated with gentamicin plus metronidazole group.
